# Supplementary material
Source: Research Square preprint supplement (doi:10.21203/rs.3.rs-8991095/v1)
Supplement: Supplementary file 1 [file 70ad3cf8bd7fc61bf10e73f1.xlsx]

## Sheet: Página1
Tests	Citrate	D-Glucose	D-Frutose	D-Lactose	D-Maltose	D-Mannose	D-Xillose	L-Arabinose	Mannitol	Sucrose	Ribose	Melibiose	Galactose	Rhamnose	Lisine	Glicine	Asparagine	Arginine	Fenilalanine	Sulfide	Melanin	IAA	Ammonia	Siderophore	Nitrate reduction	Sodium Azide growth	Phenol growth	Calcium Phosphate Solubilization	15ºC	28ºC	37ºC	50ºC	pH 3	pH 5	pH 7	pH 9	pH 11	0% NaCl	2,5% NaCl	5% NaCl	7,5% NaCl	10% NaCl
Isolates
A1	++	+	+	++	++	+	+	+	++	+	++	+	+	++	++	++	++	++	-	-	+	-	+	+	-	-	-	-	++	+	+	-	-	-	++	++	-	+	+	++	++	+
F	-	++	++	+	++	++	+	+	++	++	++	++	++	+	++	++	++	++	-	-	+	+	+	+	+	-	+	++	++	++	++	-	-	++	++	++	-	++	+	+	+	-
MR1	-	++	++	++	++	++	++	+	++	++	++	++	++	++	++	++	++	++	-	-	+	-	-	-	+	-	+	++	++	++	++	+	-	+	++	++	+	++	++	++	+	+
MR2	++	++	++	++	++	++	++	+	++	++	++	++	++	++	++	++	++	++	-	-	+	+	+	-	-	-	++	-	++	++	++	++	-	++	++	++	++	++	++	++	++	++
ONIX	++	++	++	++	++	++	++	+	++	++	++	++	++	++	++	++	++	++	-	-	++	-	+	++	-	-	++	+	++	++	+	-	-	++	++	++	+	++	++	++	+	-
3	++	+	+	+	++	+	+	+	++	+	++	+	+	++	++	++	++	++	-	-	+	-	+	+	-	-	-	+	++	++	++	-	-	-	++	++	+	++	+	++	++	++
4	++	+	+	+	++	+	+	+	++	-	++	+	-	++	++	++	++	++	-	-	++	-	+	++	-	-	-	+	+	++	++	-	-	-	++	++	++	++	++	++	++	-
5	++	+	+	+	+	+	+	+	++	++	++	++	+	++	++	++	++	++	-	-	++	-	+	+	-	-	-	+	++	++	++	-	-	++	++	+	-	++	+	++	++	++
11	-	++	++	++	++	++	++	++	++	++	++	++	++	++	++	++	++	++	-	-	-	-	+	+	+	-	++	+	++	++	++	+	-	++	++	++	+	++	++	++	+	-
12	+	++	++	++	++	++	+	++	++	+	++	+	++	++	++	++	++	++	-	-	-	-	+	+	-	-	++	+	++	++	++	-	-	++	++	++	++	++	++	++	++	+
14	++	++	++	++	++	++	++	++	++	++	++	++	++	++	++	++	++	++	-	-	-	+	+	++	+	-	++	+	++	++	++	-	-	++	++	++	+	++	++	++	-	-
15	++	++	++	+	++	++	++	+	++	++	++	++	++	++	++	++	++	++	-	-	-	-	+	+	+	-	+	-	++	++	++	-	-	++	++	++	+	++	++	++	++	+
16	++	++	+	++	++	++	++	+	++	-	++	-	++	++	++	++	++	++	-	-	-	-	+	+	-	-	++	+	++	++	+	-	-	++	++	++	++	++	++	++	++	++
17	-	++	+	+	++	++	+	+	++	++	++	++	++	++	++	++	++	++	-	-	-	-	-	-	+	-	-	+	++	++	++	-	-	+	++	++	++	++	+	+	-	-
